# Supplementary material for: A PPARG Splice Variant in Granulosa Cells Is Associated with Polycystic Ovary Syndrome
Source: MDPI journal article supplement (doi:10.3390/jcm11247285), 2022-12-08
Supplement: s1 [file jcm-1986925-supplementary.pdf › jcm-1986925-supplementary.pdf]

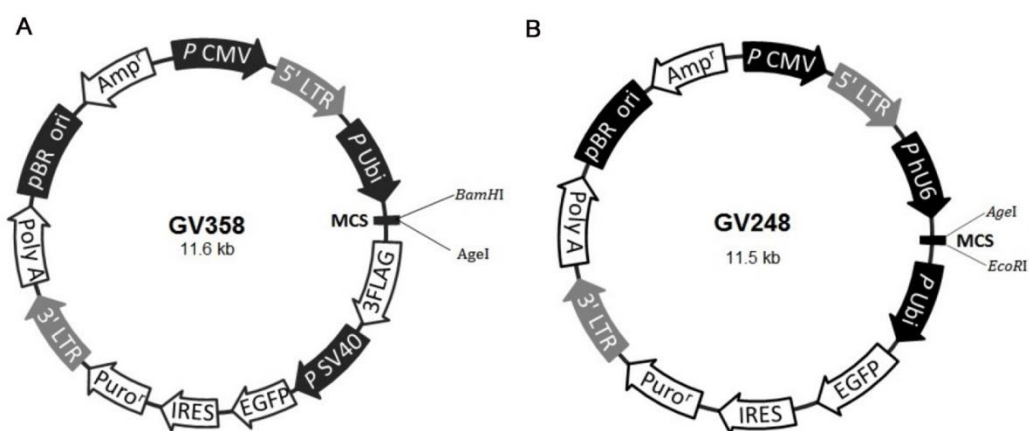

**Figure S1.** Vectors for lentiviral construction.

(A) rPPARG

Vector information:

General: 11615bp

HIV-1\_5\_LTR, trunkHIV-1\_3\_LTR: 835-1015

psi: 1067-1204

RRE: 1680-1913

ORF frame 1: 1558-2445

Ubiquitin Promoter: 2617-3833

3FLAG: 3880-3957

SV40 promoter: 3964-4341

EGFP: 4350-5069

IRES: 5092-5676

Puromycin: 5683-6282

WPRE: 6309-6896

HIV-1\_5\_LTR, trunkHIV-1\_3\_LTR: 7420-7600

pBR322\_origin: 10467-9848

Ampicillin: 11482-10622

AmpR\_promoter: 11552-11524

CAG\_enhancer: 318-605

CMV\_immeary\_promoter: 239-810

Primer locations and sequences:

Ubi-F (3756-3778) : GGGTCAATATGTAATTTTCAGTG

FLAG-R-1 (3963-3943) : GCTAGCTCATTTGTCGTCATC

The insertion sequence is shown in red, the vector sequence is shown in black, and the restriction site is underlined.

CGTTTTTGGCTTTTTTGTAGACGAAGCTTGGGCTGCAGGTGCGACTCTAGAGGATCCCCGGGTACCGGTCGCCACCATGGGT  
GAAACTCTGGGAGATTCTCCTATTGACCCAGAAAGCGATTCCCTTCACTGATACACTGTCTGCAAACATATCACAAGAAATG  
ACCATGGTTGACACAGAGATGCCATTCTGGCCCACCAACTTTGGGATCAGCTCCGTGGATCTCTCCGTAATGGAAGACCAC  
TCCCCTCCTTTGATATCAAGCCCTTCACTACTGTTGACTTCTCCAGCATTCTACTCCACATTACGAAGACATTCCATTAC  
AAGAACAGATCCAGTGGTTGCAGATTACAAGTATGACCTGAAACTTCAAGAGTACCAAAGTGCAATCAAAGTGGAGCCT  
GCATCTCCACCTTATTATTCTGAGAAGACTCAGCTCTACAATAAGCCTCATGAAGAGCCTTCCAACCTCCCTCATGGCAATT  
GAATGTCGTGTCTGTGGAGATAAAGCTTCTGGATTCTCACTATGGAGTTCATGCTTGTGAAGGATGCAAGGGTTTCTTCCGGA  
GAACAATCAGATTGAAGCTTATCTATGACAGATGTGATCTTAACTGTCTGGATCCACAAAAAAGTAGAAATAAATGTCAG  
TACTGTCTGGTTTCAGAAATGCCTTGCAGTGGGGATGTCTCATAATGCCATCAGGTTTGGGCGGATGCCACAGGCCGAGAA  
GGAGAAGCTGTTGGCGGAGATCTCCAGTGATATCGACCAGCTGAATCCAGAGTCCGCTGACCTCCGGGCCCTGGCAAAAC  
ATTTGTATGACTCATACATAAAGTCCTTCCCGCTGACCAAAGCAAAGGCGAGGGCGATCTTGACAGGAAAGACAACAGA  
CAAATCACCATTTCGTTATCTATGACATGAATTCCTTAATGATGGGAGAAGATAAAATCAAGTTCAAACACATCACCCCCCT  
GCAGGAGCAGAGCAAAGAGGTGGCCATCCGCATCTTTCAGGGCTGCCAGTTTCGCTCCGTGGAGGCTGTGCAGGAGATCA  
CAGAGTATGCCAAAAGCATTCTGGTTTTGTAAATCTTGACTTGAACGACCAAGTAACTCTCCTCAAATATGGAGTCCACG  
AGATCATTTACACAATGCTGGCCTCCTTGATGAATAAAGATGGGGTTCTCATATCCGAGGGCCAAGGCTTCATGACAAGG  
GAGTTTCTAAAGAGCCTGCGAAAGCCTTTTGGTGACTTTATGGAGCCCAAGTTTGAGTTTGCTGTGAAGTTCAATGCACTG  
GAATTAGATGACAGCGACTTGGCAATATTTATTGCTGTCATTATTCTCAGTGGAGACCGCCCAGGTTTGCTGAATGTGAAG  
CCCATGAAGACATTCAAGACAACCTGCTACAAGCCCTGGAGCTCCAGCTGAAGCTGAACCACCCTGAGTCCTCACAGCT  
GTTTGCCAAGCTGCTCCAGAAAATGACAGACCTCAGACAGATTGTACGGAACACGTGCAGCTACTGCAGGTGATCAAGA  
AGACGGAGACAGACATGAGTCTTCACCCGCTCCTGCAGGAGATCTACAAGGACTTGATACGGTATGGACTACAAGGATGAC  
GATGACAAGGATACAAAGACGACGA

(B) shPPARG

GV248

Vector information:

General: 11468bp

HIV-1\_5\_LTR, truncHIV-1\_3\_LTR: 835-1015

psi: 1067-1204

RRE: 1680-1913

ORF frame 1: 1558-2445

hU6Promoter: 2602-2869

me-shid-2: 2938-2961

Ubiquitin Promoter: 2957-4173

EGFP: 4216-4935

IRES: 4945-5529

Puromycin: 5536-6135

WPRE: 6149-6736

HIV-1\_5\_LTR, truncHIV-1\_3\_LTR: 7247-7427

pBR322-origin: 10294-9675

AmpR: 11309-10449

AmpR-promoter: 11379-11351

CAG\_enhance: 318-605

CMV\_immeary\_promoter: 239-810

Primer locations and sequences:

H1-F(2479-2502): GGAAAGAATAGTAGACATAATAGC

Ubi-R(3136-3115): ATGTCCTTCTGCTGATACTGGG

| Target Seq           | GC%    |
|----------------------|--------|
| GACCAAGTAACTCTCCTCAA | 42.86% |

| NO.                            | 5'             | STEM                     | Lo<br>op   | STEM                      | 3'         |
|--------------------------------|----------------|--------------------------|------------|---------------------------|------------|
| pparg1-<br>RNAi(63592-1)-<br>a | Ccgg           | GACCAAGTAACTCTCC<br>TCAA | CTCG<br>AG | TTTGAGGAGAGTTAC<br>TTGGTC | TTT<br>TTg |
| pparg1-<br>RNAi(63592-1)-<br>b | aattcaa<br>aaa | GACCAAGTAACTCTCC<br>TCAA | CTCG<br>AG | TTTGAGGAGAGTTAC<br>TTGGTC |            |

F\_C02.ab1NNNNNNN

AACTAAAGATTACAAAAACAAATTACAAAAATTCAAATTTTCGGGTTTATTACAGGGACAGCAGAGATCCAGTTTGTT  
AATTAATCGAGCGGCCGCCCTTCACCGAGGGCCTATTTCCCATGATTCCTTCATATTTGCATATACGATACAAGGCTGT  
AGAGAGATAATTGGAATTAATTTGACTGTAAACACAAAGATATTAGTACAAAATACGTGACGTAGAAAGTAATAATTCT  
TGGGTAGTTTGAGTTTTTAAAATTATGTTTTTAAAATGGACTATCATATGCTTACCGTAACTTGAAAGTATTTGATTCTTGG  
CTTTATATATCTTGTGGAAGGACGAAACACCGGGACCAAGTAACTCTCCTCAAACCTCGAGTTTGAGGAGAGTTACTTGGT  
CTTTTTGAATTCTCGACCTCGAGACAAATGGCAGTATTCATCCACGGATCCTAACCCGTGTCGGCTCCAGATCTGGCCTCCG  
CGCCGGGTTTTGGCGCCTCCCGCGGGCGCCCCCTCTCACGGCGAGCGCTGCCACGTACAGACGAAGGGCGCAGCGAGCG  
TCCTGATCCTTCCGCCCGACGCTCAGGACAGCGGCCCGCTGCTCATAAGACTCGGCCTTAGAACCCAGTATCAGCAGA  
AGGACATTTTAGGACGGGACTTGGGTGACTCTAGGGCACTGGTTTTCTTCCAGAGAGCGGAACAGGCGAGGAAAAGTAG  
TCCCTTCTCGGCGATTCTGCGGAGGGATCTCCGTGGGGCGGTGAACGCCGATGATTATATAAGGACGCGCCGGGTGTGGC  
ACAGCTAGTTCCGTGCGAGCCGGGATTTGGGTGCGCGTTCTTGTGTTGTGGATCGCTGTGATCGTCACTTGGTGAGTAGCGGG  
CTGCTGGGCTGGCCGGGGCTTTCGTGGCCGCCGGGCCGCTCGGTGGGACGGAAGCGTGTGGAGAGACCGCCAAGGGCTGT  
AGTCTGGGTCCGCGAGCAAGGTTGCCCTGAACTGGGGTTGGGGGGANCGCAGCAAATGNNGCTGTTCCCGAGTCTTGAT  
GNNGACGCTTGTGAGCGGGCTGTGAGGTCTGAAACAGGTGGGGGGCATGGTGGGGCGGCAGACCNNNCNTGGAGGCC  
TTCGCTAA

PSC63592-1 ccggGACCAAGTAACTCTCCTCAAActcgagTTTGAGGAGAGTTACTTGGTCtttttg

(C) shPPARG+rPPARG SV

The coding sequence of the rPPARG SV was cloned into the LV6 vector with psi-RRE-EF1a-puromycin-WPRE and then co-transfected with shPPARG lentiviruses into KGN cells to produce lentiviruses overexpressing the PPARG SV and weakly expressing normal PPARG.

The upstream and downstream primers of the target gene are respectively added with homologous sequences on both sides of NotI and BamHI on LV6 vector for subcloning of the vector. The primer sequences are as follows:

|          |                                                                     |
|----------|---------------------------------------------------------------------|
| B4537-1  | AGGGTTCCAAGCTTAAGCGGCCGCATTGA                                       |
| B4537-2  | TGAGAAAATGGCCTTGTGTATATTTGTGGTTTAGTGTGGCTTCTTTCAAATGCGGCCGCTTAA     |
| B4537-3  | AATATACAACAAGGCCATTTTCTCAAACGAGAGTCAGCCTTTAACGAAATGACCATGGTTGACAC   |
| B4537-4  | CCACGGAGCTGATCCCAAAGTTGGTGGGCCAGAATGGCATCTCTGTGTCAACCATGGTCATTTTCG  |
| B4537-5  | TGGGATCAGCTCCGTGGATCTCTCCGTAATGGAAGACCACTCCCCTCCTTTGATATCAAGCCCT    |
| B4537-6  | TTCGTAATGTGGAGTAGAAATGCTGGAGAAGTCAACAGTAGTGAAGGGCTTGATATCAAAGGAGT   |
| B4537-7  | GCATTTCTACTCCACATTACGAAGACATTCCATTACACAAGAACAGATCCAGTGGTTGCAGATTAC  |
| B4537-8  | ACTTTGATTGCACTTTGGTACTCTTGAAGTTTCAGGTCATACTTGTAATCTGCAACCACTGGATC   |
| B4537-9  | GAGTACCAAAGTGCAATCAAAGTGGAGCCTGCATCTCCACCTTATTATTCTGAGAAGACTCAGCT   |
| B4537-10 | CATGAGGGAGTTGGAAGGCTCTTCATGAGGCTTATTGTAGAGCTGAGTCTTCTCAGAATAATAAG   |
| B4537-11 | GCCTTCCAACCTCCCTCATGGCAATTGAATGTCGTGTCTGTGGAGATAAAGCTTCTGGATTTCACT  |
| B4537-12 | CCGGAAGAAACCCTTGCATCCTTACAAGCATGAACTCCATAGTGAAATCCAGAAGCTTTATCTC    |
| B4537-13 | ATGCAAGGGTTTCTTCCGGAGAACAATCAGATTGAAGCTTATCTATGACAGATGTGATCTTAAC    |
| B4537-14 | GTACTGACATTTATTTCTACTTTTTTTGTGGATCCGACAGTTAAGATCACATCTGTCATAGATAA   |
| B4537-15 | ACAAAAAAGTAGAAATAAATGTCAGTACTGTCGGTTTCAGAAATGCCTTGCAGTGGGGATGTCT    |
| B4537-16 | TCTCCTTCTCGGCCTGTGGCATCCGCCCAAACCTGATGGCATTATGAGACATCCCCACTGCAAGG   |
| B4537-17 | CACAGGCCGAGAAGGAGAAGCTGTTGGCGGAGATCTCCAGTGATATCGACCAGCTGAATCCAGAG   |
| B4537-18 | TGTATGAGTCATACAAATGTTTTGCCAGGGCCCGGAGGTCAGCGGACTCTGGATTCAGCTGGTCG   |
| B4537-19 | GCAAAACATTTGTATGACTCATACATAAAGTCCTTCCCGCTGACCAAAGCAAAGGCGAGGGCGAT   |
| B4537-20 | CATTACAGCAAACCTGGGCGGTTGATTTGTCTGTTGTCTTTCTGTCAAGATCGCCCTCGCCTTG    |
| B4537-21 | GCCCAGTTTGTCTGAATGTGAAGCCATTGAAGACATTCAAGACAACCTGCTACAAGCCCTGGAG    |
| B4537-22 | TTGGCAAACAGCTGTGAGGACTCAGGGTGGTTCAGCTTCAGCTGGAGCTCCAGGGCTTGATGACG   |
| B4537-23 | CCTCACAGCTGTTTGCCAAGCTGCTCCAGAAAATGACAGACCTCAGACAGATTGTCACGGAACAC   |
| B4537-24 | CTCATGTCTGTCTCCGTCTTCTTGATCACCTGCAGTAGCTGCACGTGTTCCGTGACAATCTGTCT   |
| B4537-25 | GAAGACGGAGACAGACATGAGTCTTACCCGCTCCTGCAGGAGATCTACAAGGACTTGTACTAGC    |
| B4537-26 | ACTGGAAGAAGGGAATGTTGGCAGTGGCTCAGGACTCTCTGCTAGTACAAGTCCTTGATATCT     |
| B4537-27 | CCAACATTTCCCTTCTTCCAGTTGCACTATTCTGAGGGAAAATCTGACACCTAAGAAATTTACTG   |
| B4537-28 | CATATTCTAAAACCTTTTCTTTTAAAATGCTTTTTCACAGTAAATTTCTTAGGTGTCAGATTTT    |
| B4537-29 | GCATTTTAAAAAGAAAAGGTTTTAGAATATGATCTATTTTATGCATATTGTTTATAAAGACACAT   |
| B4537-30 | TAATATGGTAATTTTAAATATTAATAAAGTAAATTGTAAATGTGTCTTTATAACAATATGCATAAAA |
| B4537-31 | TTACAATTTACTTTTAATATTAATAAATTACCATATTATGAAATTGCTGATAGTAAAAAAAAAAAAA |
| B4537-32 | ATCAGTAGAGAGTGTGCGATCCTTTTTTTTTTTTTTTTTTACTATCAGCAATTTCA            |

Then the target gene PPARG SV was cloned into vector LV6.

The insertion sequence is shown as follows.

ATTTGAAAGAAGCCAACACTAAACCACAAATATACAACAAGGCCATTTTCTCAAACGAGAGTCAGCCTTTAACGAAATG  
 ACCATGGTTGACACAGAGATGCCATTCTGGCCCACTTGGGATCAGCTCCGTGGATCTCTCCGTAATGGAAGACCAC  
 TCCCACTCCTTTGATATCAAGCCCTTCACTACTGTTGACTTCTCCAGCATTCTACTCCACATTACGAAGACATTCCATTCAC  
 AAGAACAGATCCAGTGGTTGCAGATTACAAGTATGACCTGAACTTCAAGAGTACCAAAGTGCAATCAAAGTGGAGCCT  
 GCATCTCCACCTTATTATTCTGAGAAGACTCAGCTCTACAATAAGCCTCATGAAGAGCCTTCCAACCTCCCTCATGGCAATT

GAATGTCGTGTCTGTGGAGATAAAGCTTCTGGATTTCACTATGGAGTTCATGCTTGTGAAGGATGCAAGGGTTTCTTCCGGA  
GAACAATCAGATTGAAGCTTATCTATGACAGATGTGATCTTAACTGTCGGATCCACAAAAAAGTAGAAATAAATGTCAG  
TACTGTCGGTTTCAGAAATGCCTTGCAGTGGGGATGTCTCATAATGCCATCAGGTTTGGGCGGATGCCACAGGCCGAGAA  
GGAGAAGCTGTTGGCGGAGATCTCCAGTGATATCGACCAGCTGAATCCAGAGTCCGCTGACCTCCGGGCCCTGGCAAAAC  
ATTTGTATGACTCATACATAAAGTCCTTCCCGCTGACCAAAGCAAAGGCGAGGGCGATCTTGACAGGAAAGACAACAGA  
CAATCAACCGCCAGGTTTGTGAATGTGAAGCCATTGAAGACATTCAAGACAACCTGCTACAAGCCCTGGAGCTCCA  
GCTGAAGCTGAACCACCCTGAGTCCTCACAGCTGTTTGCCAAGCTGCTCCAGAAAATGACAGACCTCAGACAGATTGTCA  
CGGAACACGTGCAGCTACTGCAGGTGATCAAGAAGACGGAGACAGACATGAGTCTTCACCCGCTCCTGCAGGAGATCTA  
CAAGGACTTGTACTAGCAGAGAGTCTGAGCCACTGCCAACATTTCCCTTCTTCAGTTGCACTATTCTGAGGGAAAATCT  
GACACCTAAGAAATTTACTGTGAAAAAGCATTTTAAAAAAGAAAGGTTTTAGAATATGATCTATTTTATGCATATTGTTTA  
TAAAGACACATTTACAATTTACTTTTAATATTAATAAATTACCATATTATGAAATTGCTGATAGTAAAAAAAAAAAAAAAAAA  
AA

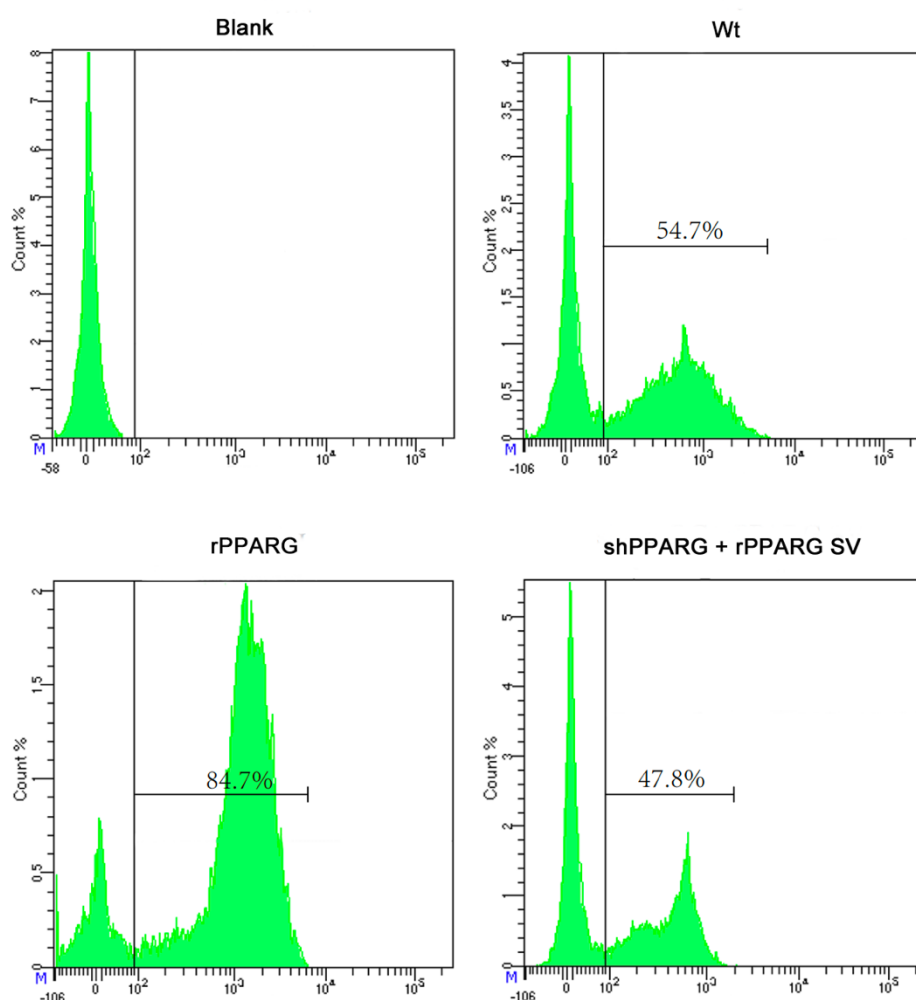

**Figure S2.** The apoptosis ratio of KGN cells treated with different lentivirus in each group was detected by flow cytometry using TUNEL staining. The figure shows the apoptosis rate decreased following the transfection of PPARG SV.

**Table S1.** The primers for PCR.

| Category                 | target sequence      | specific primer              | sequence ( 5' to 3')               |
|--------------------------|----------------------|------------------------------|------------------------------------|
| Primers for SMARTer RACE | full length of PPARG | SMARTer RACE 3'RT primer-1   | AAG GGA AAT GTT GGC AGT GG         |
|                          |                      | SMARTer RACE 3'RT primer-2   | GAT CTC CTG CTG CAG GAG CGG GTG    |
|                          |                      | SMARTer RACE 3'RT primer-3   | CTG TCT CCG TCT TCT TGA TCA CCT GC |
|                          |                      | SMARTer RACE3'RT primer-4    | GTG CAA CTG GAA GAA CTC TCT GCT AG |
| Primers for qRT PCR      | PPARG exon5          | PPARG-ex5-F-1                | ACA TAA AGT CCT TCC CGC TG         |
|                          |                      | PPARG-ex5-R-1                | AGC AGG TTG TCT TGA ATG TCT        |
|                          | PPARG exon5 del      | PPARG ex5 Del qPCR Primer1 F | CGA GAA GGA GAA GCT GTT GG         |
|                          |                      | PPARG ex5 Del qPCR Primer1 R | GCG GTT GAT TTG TCT GTT GT         |
|                          | ACTB                 | ACTB-F                       | AGC GAG CAT CCC CCA AAG TT         |
|                          |                      | ACTB-R                       | GGG CAC GAA GGC TCA TCA TT         |
|                          | PPARG exon1          | PPARG-ex1-F-1                | ACA AGG CCA TTT TCT CAA AC         |
|                          |                      | PPARG-ex1-R-1                | TAA GGT GGA GAT GCA GGC TC         |
|                          |                      | PPARG-ex1-F-2                | ACC ACA AAT ATA CAA CAA GGC CA     |
|                          |                      | PPARG-ex1-R-2                | CAG GCT CCA CTT TGA TTG CA         |
|                          | PPARG exon2          | PPARG-ex2-F-1                | TCT CCA GCA TTT CTA CTC CAC A      |
|                          |                      | PPARG-ex2-R-1                | GTG GAT CCG ACA GTT AAG ATC AC     |
|                          |                      | PPARG-ex2-F-2                | TCA AGC CCT TCA CTA CTG TTG        |
|                          |                      | PPARG-ex2-R-2                | TGA AAC CGA CAG TAC TGA CAT TT     |
|                          | PPARG exon3          | PPARG-ex3-F-1                | TGA ATG TCG TGT CTG TGG AGA        |
|                          |                      | PPARG-ex3-R-1                | AGC TGG TCG ATA TCA CTG GAG        |
|                          |                      | PPARG-ex3-F-2                | GTC GTG TCT GTG GAG ATA AAG C      |
|                          |                      | PPARG-ex3-R-2                | GGA TTC AGC TGG TCG ATA TCA C      |
| Primers for PCR          | PPARG exon4          | PPARG-ex3-F-3                | CCA ACT CCC TCA TGG CAA TT         |
|                          |                      | PPARG-ex3-R-3                | CAA CAG CTT CTC CTT CTC GG         |
|                          |                      | PPARG-ex4-F                  | GTG ATC TTA ACT GTC GGA TCC AC     |
|                          |                      | PPARG-ex4-R                  | GGG GTG ATG TGT TTG AAC TTG A      |
|                          | PPARG exon5          | PPARG-ex5-F-1                | ACA TAA AGT CCT TCC CGC TG         |
|                          |                      | PPARG-ex5-R-1                | AGC AGG TTG TCT TGA ATG TCT        |
|                          |                      | PPARG-ex5-F-2                | ACT CAT ACA TAA AGT CCT TCC CG     |
|                          |                      | PPARG-ex5-R-2                | CTT GTA GCA GGT TGT CTT GAA TG     |
|                          | PPARG EXON6          | PPARG-ex6-F-1                | TGC ACT GGA ATT AGA TGA CAG C      |
|                          |                      | PPARG-ex6-R-1                | TGG AAG AAG GGA AAT GTT GGC        |
|                          |                      | PPARG-ex6-F-2                | ACT GGA ATT AGA TGA CAG CGA C      |
|                          |                      | PPARG-ex6-R-2                | CCC TCA GAA TAG TGC AAC TGG        |

**Table S2.** The antibodies for Western Blot.

| Antibody                     | Dilution ratio | Company     | Code No.  |
|------------------------------|----------------|-------------|-----------|
| ACTB                         | 1:5000         | Proteintech | HRP-66009 |
| Caspase-3 Antibody           | 1:1000         | CST         | 9662      |
| Caspase-8 (D35G2) Rabbit mAb | 1:1000         | CST         | 4790      |
| Caspase-9 (C9) Mouse mAb     | 1:1000         | CST         | 9508      |
